RESEARCH ARTICLE

# Incidence of lung cancer histologic cell-types according to neighborhood factors: A population based study in California

Mindy C. DeRouen<sup>1,2,3</sup>\*, Lauren Hu<sup>4</sup>, Meg McKinley<sup>1,3</sup>, Kathleen Gali<sup>5</sup>, Manali Patel<sup>6,7,8,9</sup>, Christina Clarke<sup>1,9</sup>, Heather Wakelee<sup>6,9</sup>, Robert Haile<sup>10</sup>, Scarlett Lin Gomez<sup>1,2,3,11</sup>, Iona Cheng<sup>1,2,3,11</sup>

**1** Cancer Prevention Institute of California, Fremont, CA, United States of America, **2** Department of Epidemiology and Biostatistics, University of California San Francisco, San Francisco, CA, United States of America, **3** Greater Bay Area Cancer Registry, Fremont, CA, United States of America, **4** John A. Burns School of Medicine, University of Hawaii, Honolulu, HI, United States of America, **5** Department of Public Health, School of Social Sciences, Humanities and Arts, University of California Merced, Merced, CA, United States of America, **6** Division of Oncology, Department of Medicine, Stanford University School of Medicine, Stanford, CA, United States of America, **7** Veterans Affairs Palo Alto Health Care System, Palo Alto, CA, United States of America, **8** Primary Care and Outcomes Research, Department of Medicine, Stanford University School of Medicine, Stanford, CA, United States of America, **9** Stanford Cancer Institute, Stanford, CA, United States of America, **10** Department of Medicine, Cedars-Sinai Medical Center, Los Angeles, CA, United States of America, **11** UCSF Helen Diller Family Comprehensive Cancer Center, San Francisco, CA, United States of America

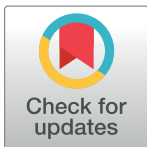

**OPEN ACCESS**

**Citation:** DeRouen MC, Hu L, McKinley M, Gali K, Patel M, Clarke C, et al. (2018) Incidence of lung cancer histologic cell-types according to neighborhood factors: A population based study in California. PLoS ONE 13(5): e0197146. <https://doi.org/10.1371/journal.pone.0197146>

**Editor:** Hajo Zeeb, Leibniz Institute for Prevention Research and Epidemiology BIPS, GERMANY

**Received:** September 6, 2017

**Accepted:** April 28, 2018

**Published:** May 23, 2018

**Copyright:** © 2018 DeRouen et al. This is an open access article distributed under the terms of the [Creative Commons Attribution License](https://creativecommons.org/licenses/by/4.0/), which permits unrestricted use, distribution, and reproduction in any medium, provided the original author and source are credited.

**Data Availability Statement:** Data used for this study are third-party data available through the California Cancer Registry, controlled by the California Department of Public Health. The data are available for qualified researchers at the following website upon request ([http://www.ccrca.org/Data\\_and\\_Statistics/Cancer\\_Data\\_for\\_Research.shtml](http://www.ccrca.org/Data_and_Statistics/Cancer_Data_for_Research.shtml)) Requests for data can be made by individuals and their affiliate institutions through submission of required documents to protect data confidentiality and comply with state law. Policies and procedures for access of confidential data and

\* These authors contributed equally to this work.

\* [MDeRouen@psg.ucsf.edu](mailto:MDeRouen@psg.ucsf.edu)

## Abstract

### Background

The relationships between neighborhood factors (i.e., neighborhood socioeconomic status (nSES) and ethnic enclave) and histologic subtypes of lung cancer for racial/ethnic groups, particularly Hispanics and Asian American/Pacific Islanders (AAPIs), are poorly understood.

### Methods

We conducted a population-based study of 75,631 Californians diagnosed with lung cancer from 2008 through 2012. We report incidence rate ratios (IRRs) for lung cancer histologic cell-types by nSES among racial/ethnic groups (non-Hispanic (NH) Whites, NH Blacks, Hispanics and AAPIs) and according to Hispanic or Asian neighborhood ethnic enclave status among Hispanics and AAPIs, respectively. In addition, we examined incidence jointly by nSES and ethnic enclave.

### Results

Patterns of lung cancer incidence by nSES and ethnic enclave differed across race/ethnicity, sex, and histologic cell-type. For adenocarcinoma, Hispanic males and females, residing in both low nSES and high nSES neighborhoods that were low enclave, had higher incidence rates compared to those residing in low nSES, high enclave neighborhoods; males (IRR, 1.17 [95% CI, 1.04–1.32] and IRR, 1.15 [95% CI, 1.02–1.29], respectively) and

application materials are available on the California Cancer Registry website (<http://www.ccrca.org/>). Additional information can be requested from the data disclosure administrator ([research@ccr.ca.gov](mailto:research@ccr.ca.gov)). Neighborhood socioeconomic status (nSES) and ethnic enclave variables were based on publicly available data from the American Community Survey results (2007–2011) available at <https://www.census.gov/programs-surveys/acs/>. Census tract level populations were obtained from: <https://factfinder.census.gov/>.

**Funding:** This work was supported by the Stanford Cancer Institute (M DeRouen, C Clarke, SL Gomez, I Cheng) and the National Cancer Institute's Surveillance, Epidemiology and End Results Program under contract HHSN261201000140C awarded to the Cancer Prevention Institute of California (M McKinley). All other authors (L Hu, K Gali, M Patel, H Wakelee, and R Haile) did not receive funding for work on this manuscript. The collection of cancer incidence data used in this study was supported by the California Department of Public Health as part of the statewide cancer reporting program mandated by California Health and Safety Code Section 103885; the National Cancer Institute's Surveillance, Epidemiology and End Results Program under contract HHSN261201000140C awarded to the Cancer Prevention Institute of California, contract HHSN261201000035C awarded to the University of Southern California, and contract HHSN261201000034C awarded to the Public Health Institute; and the Centers for Disease Control and Prevention's National Program of Cancer Registries, under agreement U58DP003862-01 awarded to the California Department of Public Health. The ideas and opinions expressed herein are those of the author (s) and endorsement by the State of California, Department of Public Health the National Cancer Institute, and the Centers for Disease Control and Prevention or their Contractors and Subcontractors is not intended nor should be inferred.

**Competing interests:** C.A. Clarke is currently a Population Health Scientist at GRAIL, Inc; this does not alter our adherence to PLOS ONE policies on sharing data and materials. No potential conflicts of interest were disclosed by the other authors.

females (IRR, 1.29 [95% CI, 1.15–1.44] and IRR, 1.51 [95% CI, 1.36–1.67], respectively). However, AAPI males residing in both low and high SES neighborhoods that were also low enclave had lower adenocarcinoma incidence.

## Conclusions

Neighborhood factors differentially influence the incidence of lung cancer histologic cell-types with heterogeneity in these associations by race/ethnicity and sex. For Hispanic males and females and AAPI males, neighborhood ethnic enclave status is strongly associated with lung adenocarcinoma incidence.

## Introduction

Lung cancer is the second-most common cancer among both males and females in the U.S. with over 222,500 new cases of lung cancer estimated to be diagnosed in 2017 [1]. Lower area-level socioeconomic status (SES) has been associated with a higher incidence of overall lung cancer and non-small-cell lung cancer (NSCLC) among non-Hispanic White and non-Hispanic Black males and females and Asian American/Pacific Islander (AAPI) males [2–5]. Disparities in the burden of lung cancer according to area-level SES may be mediated by higher smoking prevalence, lower access to and use of health care services, and/or greater exposure to environmental contaminants such as air pollution, radon, or asbestos among those residing in lower SES neighborhoods [6–10]. On the other hand, lower area-level SES has been associated with lower incidence of overall lung cancer and NSCLC among Hispanic males and females [2, 4, 5]. The reason for this paradoxical association among Hispanics is unknown, but the ethnic composition of neighborhoods, rather than SES, has been suggested to play a key role [11]. Finally, while incidence of overall lung cancer and NSCLC according to area-level SES has been examined among AAPI females, no patterns have been reported [2, 4, 5] and other neighborhood factors such as Asian enclave have not yet been examined among AAPIs.

Lung cancer is divided into two broad histologic cell type categories: small cell lung carcinoma (SCLC) and NSCLC, the latter of which is further divided into adenocarcinoma, squamous cell carcinoma (SCC), and large cell or other specified carcinoma (LC+OSC) subtypes. While prior studies have described incidence of overall lung cancer or NSCLC according to neighborhood factors, none have reported incidence according to types of NSCLC. Histologic cell types, including types of NSCLC, differ in their association with cigarette smoking and nonsmoking-related risk factors [12, 13]. For example, cigarette smoking is the strongest risk factor for every histologic cell-type of lung cancer, but the strength of this association differs by histologic cell-type; it has been reported that SCC and SCLC are more strongly associated with smoking compared to adenocarcinoma and LC+OSC [12]. It stands to reason that disentangling the variation in the incidence of histologic cell types according to neighborhood factors may provide insight into possible etiologic differences across racial/ethnic groups and may highlight vulnerable subpopulations at high risk. Therefore, we conducted a large, contemporary population-based study including 75,631 Californians diagnosed from 2008 through 2012 to compare incidence of lung cancer histologic cell-types according to neighborhood SES (nSES) and ethnic enclave status.

## Materials and methods

### Study population

The study population included all incident first primary cases of lung cancer ( $n = 75,631$ ) diagnosed from January 2008 through December 2012. Cases were identified by the California Cancer Registry (CCR), part of the National Cancer Institute's Surveillance, Epidemiology, and End Results (SEER) program. The study was conducted with IRB oversight from the Cancer Prevention Institute of California. Data on age at cancer diagnosis, sex, race/ethnicity, residential address at diagnosis, and tumor histologic cell type and stage (SEER Summary Stage) were obtained. Histologic cell-types were defined according to Lewis et al. [14] for small-cell lung cancer (SCLC), adenocarcinoma, squamous cell carcinoma (SCC), large cell and other specified carcinoma (LC+OSC), and unspecified malignant neoplasms (unspecified). Race/ethnicity was classified as non-Hispanic White, non-Hispanic Black, Hispanic, and non-Hispanic Asian American/Pacific Islander; and are hereafter referred to as White, Black, Hispanic, and AAPI; respectively. Cases with unknown race/ethnicity were excluded ( $n = 587$ ).

### Neighborhood factors

A previously developed composite score of neighborhood SES (nSES) was used based on principal component analysis of 2007–2011 American Community Survey (ACS) data on education, housing, employment, occupation, income, and poverty [15, 16]. Hispanic and Asian enclave indices were based on principal components analysis of 2007–2011 ACS variables related to Hispanic and Asian ethnic and immigrant composition and linguistic isolation, respectively [15, 16]. For both nSES and ethnic enclave, each census tract was assigned the appropriate composite score and then categorized in quartiles based on statewide distributions of scores for each factor. Lung cancer cases were assigned quartiles associated with the census tract of the geocoded residential address at diagnosis. A joint nSES+ ethnic enclave variable was created by combining each individual variable into two categories (i.e.; high nSES [quartiles 1–2], low nSES [quartiles 3–4], high enclave [quartile 4], and low enclave [quartiles 1–3]), and categorizing the joint variable into: low nSES/high enclave; low nSES/low enclave; high nSES/high enclave; high nSES/low enclave.

### Population data

The calculation of 5-year incidence rates was based on the availability of the appropriate population denominators at the census tract level from 2010 Census data. The 2010 population counts were multiplied by five to estimate the total population at risk for the 5-year pericentral period of incidence, 2008–2012.

### Statistical analysis

Incidence rate ratios (IRRs) of lung cancer and 95% confidence intervals (CI) according to quartiles of nSES and Hispanic or Asian ethnic enclave status were estimated based on incidence rates per 100,000 and age-adjusted to the 2010 US Standard population. Stratified analyses were conducted to examine patterns of associations by sex and race/ethnicity. All analyses were conducted using SEER Stat, version 6.3.4 [17].

## Results

The distribution of neighborhood factors and clinical characteristics among the 75,631 lung cancer cases diagnosed from 2008–2012 are presented in [Table 1](#). Approximately, 67% of Hispanics and 71% of Blacks resided in lower SES neighborhoods (first and second quartiles) in

**Table 1. Distribution of neighborhood factors and clinical characteristics according to race/ethnicity among lung cancer cases, California 2008–2012.**

|                                   | Total      |            | Race/ethnicity |          |          |          |          |          |            |            |
|-----------------------------------|------------|------------|----------------|----------|----------|----------|----------|----------|------------|------------|
|                                   |            |            | Hispanic       |          | AAPI     |          | Black    |          | White      |            |
|                                   | Male       | Female     | Male           | Female   | Male     | Female   | Male     | Female   | Male       | Female     |
|                                   | N = 39,457 | N = 36,174 | N = 4406       | N = 3889 | N = 4915 | N = 3634 | N = 3258 | N = 2704 | N = 26,878 | N = 25,947 |
| n                                 | n          | n          | n              | n        | n        | n        | n        | n        | n          |            |
| (%)                               | (%)        | (%)        | (%)            | (%)      | (%)      | (%)      | (%)      | (%)      | (%)        |            |
| <b>nSES</b>                       |            |            |                |          |          |          |          |          |            |            |
| Q4-high                           | 9546       | 9639       | 459            | 528      | 1373     | 1177     | 334      | 254      | 7380       | 7680       |
|                                   | (24.2%)    | (26.6%)    | (10.4%)        | (13.6%)  | (27.9%)  | (32.4%)  | (10.3%)  | (9.4%)   | (27.5%)    | (29.6%)    |
| Q3                                | 10710      | 10056      | 863            | 878      | 1410     | 1008     | 665      | 526      | 7772       | 7644       |
|                                   | (27.1%)    | (27.8%)    | (19.6%)        | (22.6%)  | (28.7%)  | (27.7%)  | (20.4%)  | (19.5%)  | (28.9%)    | (29.5%)    |
| Q2                                | 10843      | 9488       | 1283           | 1086     | 1290     | 878      | 910      | 807      | 7360       | 6717       |
|                                   | (27.5%)    | (26.2%)    | (29.1%)        | (27.9%)  | (26.2%)  | (24.2%)  | (27.9%)  | (29.8%)  | (27.4%)    | (25.9%)    |
| Q1-low                            | 8358       | 6991       | 1801           | 1397     | 842      | 571      | 1349     | 1117     | 4366       | 3906       |
|                                   | (21.2%)    | (19.3%)    | (40.9%)        | (35.9%)  | (17.1%)  | (15.7%)  | (41.4%)  | (41.3%)  | (16.2%)    | (15.1%)    |
| <b>Ethnic enclave<sup>1</sup></b> |            |            |                |          |          |          |          |          |            |            |
| Q1-low                            | ~          | ~          | 452            | 503      | 202      | 197      | ~        | ~        | ~          | ~          |
|                                   |            |            | (10.3%)        | (12.9%)  | (4.1%)   | (5.4%)   |          |          |            |            |
| Q2                                | ~          | ~          | 744            | 805      | 511      | 454      | ~        | ~        | ~          | ~          |
|                                   |            |            | (16.9%)        | (20.7%)  | (10.4%)  | (12.5%)  |          |          |            |            |
| Q3                                | ~          | ~          | 1257           | 1141     | 965      | 737      | ~        | ~        | ~          | ~          |
|                                   |            |            | (28.5%)        | (29.3%)  | (19.6%)  | (20.3%)  |          |          |            |            |
| Q4-high                           | ~          | ~          | 1953           | 1440     | 3237     | 2246     | ~        | ~        | ~          | ~          |
|                                   |            |            | (44.3%)        | (37.0%)  | (65.9%)  | (61.8%)  |          |          |            |            |
| <b>Histologic cell-type</b>       |            |            |                |          |          |          |          |          |            |            |
| Adenocarcinoma                    | 17126      | 18803      | 1897           | 2084     | 2584     | 2610     | 1386     | 1317     | 11259      | 12792      |
|                                   | (43.4%)    | (52.0%)    | (43.1%)        | (53.6%)  | (52.6%)  | (71.8%)  | (42.5%)  | (48.7%)  | (41.9%)    | (49.3%)    |
| SCC                               | 9197       | 5617       | 982            | 544      | 920      | 290      | 769      | 475      | 6526       | 4308       |
|                                   | (23.3%)    | (15.5%)    | (22.3%)        | (14.0%)  | (18.7%)  | (8.0%)   | (23.6%)  | (17.6%)  | (24.3%)    | (16.6%)    |
| SCLC                              | 4243       | 4102       | 472            | 406      | 412      | 148      | 282      | 296      | 3077       | 3252       |
|                                   | (10.8%)    | (11.3%)    | (10.7%)        | (10.4%)  | (8.4%)   | (4.1%)   | (8.7%)   | (10.9%)  | (11.4%)    | (12.5%)    |
| LC+OSC                            | 2781       | 2798       | 374            | 364      | 268      | 175      | 219      | 209      | 1920       | 2050       |
|                                   | (7.0%)     | (7.7%)     | (8.5%)         | (9.4%)   | (5.5%)   | (4.8%)   | (6.7%)   | (7.7%)   | (7.1%)     | (7.9%)     |
| Unspecified                       | 6109       | 4854       | 681            | 491      | 730      | 411      | 602      | 407      | 4096       | 3545       |
|                                   | (15.5%)    | (13.4%)    | (15.5%)        | (12.6%)  | (14.9%)  | (11.3%)  | (18.5%)  | (15.1%)  | (15.2%)    | (13.7%)    |
| <b>Age (years)</b>                |            |            |                |          |          |          |          |          |            |            |
| < 50                              | 1371       | 1475       | 274            | 308      | 244      | 264      | 131      | 198      | 722        | 705        |
|                                   | (3.5%)     | (4.1%)     | (6.2%)         | (7.9%)   | (5.0%)   | (7.3%)   | (4.0%)   | (7.3%)   | (2.7%)     | (2.7%)     |
| 50–59                             | 5350       | 4753       | 610            | 602      | 679      | 601      | 717      | 557      | 3344       | 2993       |
|                                   | (13.6%)    | (13.1%)    | (13.8%)        | (15.5%)  | (13.8%)  | (16.5%)  | (22.0%)  | (20.6%)  | (12.4%)    | (11.5%)    |
| 60–69                             | 11456      | 9968       | 1181           | 1050     | 1348     | 920      | 1055     | 842      | 7872       | 7156       |
|                                   | (29.0%)    | (27.6%)    | (26.8%)        | (27.0%)  | (27.4%)  | (25.3%)  | (32.4%)  | (31.1%)  | (29.3%)    | (27.6%)    |
| 70–79                             | 13092      | 11967      | 1449           | 1206     | 1593     | 1136     | 968      | 761      | 9082       | 8864       |
|                                   | (33.2%)    | (33.1%)    | (32.9%)        | (31.0%)  | (32.4%)  | (31.3%)  | (29.7%)  | (28.1%)  | (33.8%)    | (34.2%)    |
| 80+                               | 8188       | 8011       | 892            | 723      | 1051     | 713      | 387      | 346      | 5858       | 6229       |
|                                   | (20.8%)    | (22.1%)    | (20.2%)        | (18.6%)  | (21.4%)  | (19.6%)  | (11.9%)  | (12.8%)  | (21.8%)    | (24.0%)    |
| <b>Stage</b>                      |            |            |                |          |          |          |          |          |            |            |
| Localized                         | 6602       | 7634       | 552            | 795      | 706      | 672      | 461      | 455      | 4883       | 5712       |
|                                   | (16.7%)    | (21.1%)    | (12.5%)        | (20.4%)  | (14.4%)  | (18.5%)  | (14.1%)  | (16.8%)  | (18.2%)    | (22.0%)    |

(Continued)

Table 1. (Continued)

|          | Race/ethnicity |            |          |          |          |          |          |          |            |            |
|----------|----------------|------------|----------|----------|----------|----------|----------|----------|------------|------------|
|          | Total          |            | Hispanic |          | AAPI     |          | Black    |          | White      |            |
|          | Male           | Female     | Male     | Female   | Male     | Female   | Male     | Female   | Male       | Female     |
|          | N = 39,457     | N = 36,174 | N = 4406 | N = 3889 | N = 4915 | N = 3634 | N = 3258 | N = 2704 | N = 26,878 | N = 25,947 |
|          | n              | n          | n        | n        | n        | n        | n        | n        | n          | n          |
|          | (%)            | (%)        | (%)      | (%)      | (%)      | (%)      | (%)      | (%)      | (%)        | (%)        |
| Regional | 8594           | 7870       | 886      | 789      | 993      | 701      | 709      | 607      | 6006       | 5773       |
|          | (21.8%)        | (21.8%)    | (20.1%)  | (20.3%)  | (20.2%)  | (19.3%)  | (21.8%)  | (22.4%)  | (22.3%)    | (22.2%)    |
| Distant  | 23121          | 19540      | 2815     | 2169     | 3043     | 2143     | 1995     | 1566     | 15268      | 13662      |
|          | (58.6%)        | (54.0%)    | (63.9%)  | (55.8%)  | (61.9%)  | (59.0%)  | (61.2%)  | (57.9%)  | (56.8%)    | (52.7%)    |
| Unstaged | 1096           | 1068       | 149      | 127      | 166      | 111      | 92       | 74       | 689        | 756        |
|          | (2.8%)         | (3.0%)     | (3.4%)   | (3.3%)   | (3.4%)   | (3.1%)   | (2.8%)   | (2.7%)   | (2.6%)     | (2.9%)     |

1. The ethnic enclave variable is defined only for Hispanic and Asian race/ethnicities.

2. AAPI, Asian American/Pacific Islander; nSES, neighborhood socioeconomic status; IRR, incidence rate ratio; CI, confidence interval; SCC, squamous cell carcinoma; SCLC, small cell lung cancer; LC+OSC, large cell and other cell lung cancer

<https://doi.org/10.1371/journal.pone.0197146.t001>

comparison to 41.9% of AAPIs and 42.3% of Whites. Proportionally more Hispanics and AAPIs resided in the highest enclave neighborhoods. Across all racial/ethnic groups combined, adenocarcinoma (47.5%) was the most common histologic cell-type.

Table 2 and S1 Fig present IRRs by nSES for overall lung cancer and histologic cell-types among males, stratified by racial/ethnic group. For overall lung cancer, Black, AAPI, and White male residents of lower SES neighborhoods had higher incidence of lung cancer compared to those in high SES neighborhoods. For adenocarcinoma, White male residents of lower SES neighborhoods had higher incidence (Q1 vs Q4: IRR, 1.42 [95% CI, 1.34–1.51]), and a similar pattern was suggested, although non-significant, among Black and AAPI males. In contrast, Hispanic male residents of lower SES neighborhoods, compared to high SES neighborhoods, had lower incidence of adenocarcinoma (Q1 vs. Q4: IRR, 0.86; [95% CI, 0.74–1.01]). For all other histologic cell-types (SCLC, SCC, LC+OSC) and unspecified lung cancers, Black, AAPI, and White male residents of lower SES neighborhoods had higher incidence (although IRRs were not significant for Black males with SCLC). For example, a greater than 2.5-fold incidence rate of SCC was observed in White males living in the lowest SES neighborhoods compared to the highest SES neighborhoods (Q1 vs. Q4: IRR, 2.81 [95% CI, 2.60–3.03]).

Among females (Table 3 and S2 Fig), Blacks and Whites residing in lower SES neighborhoods had higher incidence of overall lung cancer (Blacks Q1 vs. Q4: IRR, 1.43 [95% CI, 1.25–1.66] and Whites Q1 vs. Q4: IRR, 1.68 [95% CI, 1.61–1.75]) (Table 3). Conversely, Hispanic females residing in lower SES neighborhoods had lower incidence of overall lung cancer (Q1 vs. Q4: IRR, 0.79 [95% CI, 0.71–0.88]). For adenocarcinoma and LC+OSC, White females residing in lower SES neighborhoods, compared to high SES neighborhoods, had higher incidence, while Hispanic females residing in lower SES neighborhoods had lower incidence. For SCC and SCLC, Black, AAPI, and White females residing in lower SES neighborhoods, compared to high SES neighborhoods, had higher incidence.

Tables 4 and 5 and S3 and S4 Figs present IRRs of overall lung cancer and histologic cell-types by Hispanic and Asian ethnic enclave among Hispanics and AAPI, respectively. Among Hispanics residing in lower Hispanic enclave (more acculturated) neighborhoods compared to higher enclave neighborhoods (Table 4 and S3 Fig), higher incidence was observed for overall lung cancer and adenocarcinoma among both males and females (adenocarcinoma, Q1 vs. Q4:

**Table 2. Lung cancer incidence rate ratios<sup>1</sup> for all lung cancers and histologic cell-types by nSES for males according to race/ethnicity, California 2008–2012.**

|                     | nSES <sup>2</sup> | Hispanic |                  |                       | AAPI <sup>2</sup> |             |                     | Black |             |                     | White |             |                     |
|---------------------|-------------------|----------|------------------|-----------------------|-------------------|-------------|---------------------|-------|-------------|---------------------|-------|-------------|---------------------|
|                     |                   | Cases    | IRR <sup>2</sup> | (95% CI) <sup>2</sup> | Cases             | IRR         | (95% CI)            | Cases | IRR         | (95% CI)            | Cases | IRR         | (95% CI)            |
| Overall lung cancer | Q4-high           | 459      | 1.00             | reference             | 1373              | 1.00        | reference           | 334   | 1.00        | reference           | 7380  | 1.00        | reference           |
|                     | Q3                | 863      | 1.01             | (0.90, 1.14)          | 1410              | <b>1.19</b> | <b>(1.10, 1.28)</b> | 665   | <b>1.16</b> | <b>(1.00, 1.34)</b> | 7772  | <b>1.30</b> | <b>(1.26, 1.34)</b> |
|                     | Q2                | 1283     | 1.00             | (0.89, 1.12)          | 1290              | <b>1.26</b> | <b>(1.16, 1.36)</b> | 910   | <b>1.27</b> | <b>(1.11, 1.46)</b> | 7360  | <b>1.56</b> | <b>(1.51, 1.62)</b> |
|                     | Q1-low            | 1801     | 1.02             | (0.92, 1.14)          | 842               | <b>1.32</b> | <b>(1.20, 1.44)</b> | 1349  | <b>1.50</b> | <b>(1.32, 1.71)</b> | 4366  | <b>2.00</b> | <b>(1.92, 2.08)</b> |
| Adenocarcinoma      | Q4-high           | 224      | 1.00             | reference             | 803               | 1.00        | reference           | 165   | 1.00        | reference           | 3584  | 1.00        | reference           |
|                     | Q3                | 367      | 0.88             | (0.74, 1.05)          | 747               | 1.08        | (0.98, 1.20)        | 284   | 0.95        | (0.77, 1.17)        | 3288  | <b>1.13</b> | <b>(1.08, 1.19)</b> |
|                     | Q2                | 556      | 0.87             | (0.74, 1.02)          | 643               | 1.09        | (0.98, 1.21)        | 393   | 1.03        | (0.85, 1.26)        | 2869  | <b>1.25</b> | <b>(1.19, 1.31)</b> |
|                     | Q1-low            | 750      | 0.86             | (0.74, 1.01)          | 391               | 1.07        | (0.94, 1.21)        | 544   | 1.18        | (0.98, 1.43)        | 1518  | <b>1.42</b> | <b>(1.34, 1.51)</b> |
| SCC <sup>2</sup>    | Q4-high           | 95       | 1.00             | reference             | 223               | 1.00        | reference           | 67    | 1.00        | reference           | 1508  | 1.00        | reference           |
|                     | Q3                | 207      | 1.20             | (0.93, 1.57)          | 252               | <b>1.27</b> | <b>(1.05, 1.53)</b> | 160   | <b>1.50</b> | <b>(1.11, 2.07)</b> | 1854  | <b>1.53</b> | <b>(1.43, 1.64)</b> |
|                     | Q2                | 289      | 1.16             | (0.91, 1.50)          | 260               | <b>1.53</b> | <b>(1.27, 1.85)</b> | 215   | <b>1.64</b> | <b>(1.22, 2.24)</b> | 1918  | <b>2.01</b> | <b>(1.87, 2.15)</b> |
|                     | Q1-low            | 391      | 1.12             | (0.88, 1.43)          | 185               | <b>1.69</b> | <b>(1.38, 2.07)</b> | 327   | <b>1.93</b> | <b>(1.46, 2.60)</b> | 1246  | <b>2.81</b> | <b>(2.60, 3.03)</b> |
| SCLC <sup>2</sup>   | Q4-high           | 41       | 1.00             | reference             | 88                | 1.00        | reference           | 31    | 1.00        | reference           | 706   | 1.00        | reference           |
|                     | Q3                | 88       | 1.12             | (0.76, 1.70)          | 123               | <b>1.64</b> | <b>(1.23, 2.20)</b> | 57    | 1.03        | (0.63, 1.72)        | 912   | <b>1.58</b> | <b>(1.43, 1.75)</b> |
|                     | Q2                | 130      | 1.12             | (0.77, 1.66)          | 129               | <b>1.97</b> | <b>(1.48, 2.64)</b> | 78    | 1.19        | (0.76, 1.95)        | 902   | <b>2.03</b> | <b>(1.83, 2.24)</b> |
|                     | Q1-low            | 213      | 1.35             | (0.95, 1.97)          | 72                | <b>1.74</b> | <b>(1.25, 2.42)</b> | 116   | 1.34        | (0.87, 2.14)        | 557   | <b>2.69</b> | <b>(2.40, 3.02)</b> |
| LC+OSC <sup>2</sup> | Q4-high           | 34       | 1.00             | reference             | 69                | 1.00        | reference           | 20    | 1.00        | reference           | 558   | 1.00        | reference           |
|                     | Q3                | 75       | 1.19             | (0.78, 1.88)          | 73                | 1.31        | (0.92, 1.87)        | 47    | 1.43        | (0.80, 2.64)        | 546   | <b>1.20</b> | <b>(1.07, 1.36)</b> |
|                     | Q2                | 110      | 1.07             | (0.71, 1.65)          | 77                | <b>1.57</b> | <b>(1.11, 2.23)</b> | 64    | 1.43        | (0.83, 2.59)        | 506   | <b>1.44</b> | <b>(1.27, 1.63)</b> |
|                     | Q1-low            | 155      | 1.11             | (0.76, 1.70)          | 49                | <b>1.66</b> | <b>(1.12, 2.46)</b> | 88    | <b>1.77</b> | <b>(1.05, 3.16)</b> | 310   | <b>1.89</b> | <b>(1.63, 2.18)</b> |
| Unspecified         | Q4-high           | 65       | 1.00             | reference             | 189               | 1.00        | reference           | 51    | 1.00        | reference           | 1024  | 1.00        | reference           |
|                     | Q3                | 126      | 1.01             | (0.73, 1.40)          | 215               | <b>1.26</b> | <b>(1.02, 1.55)</b> | 117   | 1.38        | (0.96, 2.03)        | 1172  | <b>1.42</b> | <b>(1.30, 1.55)</b> |
|                     | Q2                | 198      | 1.11             | (0.83, 1.52)          | 181               | 1.20        | (0.97, 1.48)        | 160   | <b>1.59</b> | <b>(1.12, 2.30)</b> | 1165  | <b>1.78</b> | <b>(1.63, 1.94)</b> |
|                     | Q1-low            | 292      | 1.16             | (0.88, 1.57)          | 145               | <b>1.55</b> | <b>(1.23, 1.94)</b> | 274   | <b>2.03</b> | <b>(1.46, 2.89)</b> | 735   | <b>2.42</b> | <b>(2.19, 2.67)</b> |

1. Bold type indicates statistical significance

2. AAPI, Asian American/Pacific Islander; nSES, neighborhood socioeconomic status; IRR, incidence rate ratio; CI, confidence interval; SCC, squamous cell carcinoma; SCLC, small cell lung cancer; LC+OSC, large cell and other cell lung cancer

<https://doi.org/10.1371/journal.pone.0197146.t002>

IRR, 1.24 [95% CI, 1.05–1.46] and IRR, 1.64 [95% CI, 1.42–1.89], respectively). For SCC and LC+OSC, similar patterns of higher incidence rates for those in lower enclave neighborhoods were observed among Hispanic females. Hispanic females residing in lower enclave neighborhoods, compared to high enclave neighborhoods, also had higher incidence of SCLC (Q1 vs. Q4: IRR, 1.68 [95% CI, 1.19–2.32]), but results suggested the opposite pattern of SCLC incidence among Hispanic males residing in lower enclave neighborhoods (Q3 vs. Q4: IRR, 0.72 [95% CI, 0.56–0.91]).

Among AAPI males (Table 5 and S4 Fig), there were no differences in incidence of overall lung cancer or specific histologic cell-types according to Asian ethnic enclave. There were also no differences in incidence of overall lung cancer or adenocarcinoma according to Asian ethnic enclave among AAPI females. However, AAPI females residing in lower relative to higher enclave neighborhoods had substantially higher incidence of SCC and SCLC (Q1 vs. Q4: IRR, 2.64 [95%CI, 1.69–4.01] and IRR, 2.86 [95% CI, 1.59–4.91], respectively).

We also examined incidence of overall lung cancer and adenocarcinoma (the most common histologic cell-type) jointly by nSES and ethnic enclave (Table 6 and S5 Fig). For overall lung cancer, Hispanic males residing in low SES, low enclave neighborhoods had higher incidence compared to those in low SES, high enclave neighborhoods. On the other hand,



**Table 3. Lung cancer incidence rate ratios<sup>1</sup> for all lung cancers and histologic cell-types by nSES for females according to race/ethnicity, California 2008–2012.**

|                     | nSES <sup>2</sup> | Hispanic |                  |                       | AAPI <sup>2</sup> |             |                     | Black |             |                     | White |             |                     |
|---------------------|-------------------|----------|------------------|-----------------------|-------------------|-------------|---------------------|-------|-------------|---------------------|-------|-------------|---------------------|
|                     |                   | Cases    | IRR <sup>2</sup> | (95% CI) <sup>2</sup> | Cases             | IRR         | (95% CI)            | Cases | IRR         | (95% CI)            | Cases | IRR         | (95% CI)            |
| Overall lung cancer | Q4-high           | 528      | 1.00             | reference             | 1,177             | 1.00        | reference           | 254   | 1.00        | reference           | 7,680 | 1.00        | reference           |
|                     | Q3                | 878      | 0.95             | (0.85, 1.06)          | 1,008             | 0.97        | (0.89, 1.06)        | 526   | 1.09        | (0.93, 1.27)        | 7,644 | <b>1.18</b> | <b>(1.14, 1.22)</b> |
|                     | Q2                | 1,086    | <b>0.81</b>      | <b>(0.73, 0.91)</b>   | 878               | 1.00        | (0.91, 1.09)        | 807   | <b>1.31</b> | <b>(1.13, 1.52)</b> | 6,717 | <b>1.32</b> | <b>(1.27, 1.36)</b> |
|                     | Q1-low            | 1,397    | <b>0.79</b>      | <b>(0.71, 0.88)</b>   | 571               | 1.09        | (0.98, 1.21)        | 1,117 | <b>1.43</b> | <b>(1.25, 1.66)</b> | 3,906 | <b>1.68</b> | <b>(1.61, 1.75)</b> |
| Adenocarcinoma      | Q4-high           | 320      | 1.00             | reference             | 885               | 1.00        | reference           | 148   | 1.00        | reference           | 4,312 | 1.00        | Reference           |
|                     | Q3                | 487      | 0.87             | (0.75, 1.00)          | 713               | 0.92        | (0.83, 1.01)        | 268   | 0.94        | (0.76, 1.17)        | 3,771 | 1.04        | (0.99, 1.08)        |
|                     | Q2                | 558      | <b>0.69</b>      | <b>(0.59, 0.79)</b>   | 624               | 0.94        | (0.85, 1.05)        | 410   | 1.15        | (0.94, 1.40)        | 3,116 | <b>1.09</b> | <b>(1.04, 1.14)</b> |
|                     | Q1-low            | 719      | <b>0.67</b>      | <b>(0.59, 0.77)</b>   | 388               | 1.00        | (0.88, 1.13)        | 491   | 1.08        | (0.89, 1.31)        | 1,593 | <b>1.23</b> | <b>(1.15, 1.30)</b> |
| SCC <sup>2</sup>    | Q4-high           | 57       | 1.00             | reference             | 72                | 1.00        | reference           | 26    | 1.00        | reference           | 1,010 | 1.00        | Reference           |
|                     | Q3                | 105      | 1.06             | (0.76, 1.49)          | 79                | 1.21        | (0.87, 1.71)        | 85    | <b>1.80</b> | <b>(1.13, 2.96)</b> | 1,285 | <b>1.49</b> | <b>(1.37, 1.62)</b> |
|                     | Q2                | 166      | 1.12             | (0.83, 1.56)          | 93                | <b>1.72</b> | <b>(1.25, 2.39)</b> | 135   | <b>2.32</b> | <b>(1.50, 3.73)</b> | 1,204 | <b>1.77</b> | <b>(1.62, 1.93)</b> |
|                     | Q1-low            | 216      | 1.11             | (0.82, 1.52)          | 46                | 1.35        | (0.91, 2.00)        | 229   | <b>3.06</b> | <b>(2.00, 4.84)</b> | 809   | <b>2.58</b> | <b>(2.34, 2.84)</b> |
| SCLC <sup>2</sup>   | Q4-high           | 46       | 1.00             | reference             | 37                | 1.00        | reference           | 21    | 1.00        | reference           | 730   | 1.00        | Reference           |
|                     | Q3                | 83       | 1.01             | (0.70, 1.49)          | 40                | 1.12        | (0.69, 1.82)        | 48    | 1.20        | (0.70, 2.14)        | 938   | <b>1.52</b> | <b>(1.38, 1.69)</b> |
|                     | Q2                | 115      | 1.01             | (0.71, 1.47)          | 40                | 1.32        | (0.82, 2.15)        | 86    | 1.60        | (0.97, 2.75)        | 959   | <b>1.96</b> | <b>(1.77, 2.17)</b> |
|                     | Q1-low            | 162      | 1.06             | (0.75, 1.51)          | 31                | <b>1.75</b> | <b>(1.04, 2.93)</b> | 141   | <b>2.07</b> | <b>(1.29, 3.50)</b> | 625   | <b>2.82</b> | <b>(2.53, 3.16)</b> |
| LC+OSC <sup>2</sup> | Q4-high           | 52       | 1.00             | reference             | 55                | 1.00        | reference           | 18    | 1.00        | reference           | 623   | 1.00        | Reference           |
|                     | Q3                | 88       | 0.97             | (0.67, 1.40)          | 50                | 1.06        | (0.71, 1.60)        | 41    | 1.11        | (0.62, 2.10)        | 595   | <b>1.15</b> | <b>(1.02, 1.29)</b> |
|                     | Q2                | 108      | 0.82             | (0.58, 1.17)          | 41                | 1.03        | (0.67, 1.59)        | 59    | 1.27        | (0.73, 2.32)        | 516   | <b>1.26</b> | <b>(1.12, 1.43)</b> |
|                     | Q1-low            | 116      | <b>0.68</b>      | <b>(0.48, 0.96)</b>   | 29                | 1.21        | (0.74, 1.97)        | 91    | 1.62        | (0.96, 2.91)        | 316   | <b>1.70</b> | <b>(1.47, 1.96)</b> |
| Unspecified         | Q4-high           | 53       | 1.00             | reference             | 128               | 1.00        | reference           | 41    | 1.00        | reference           | 1,005 | 1.00        | Reference           |
|                     | Q3                | 115      | 1.21             | (0.86, 1.72)          | 126               | 1.09        | (0.84, 1.41)        | 84    | 1.07        | (0.72, 1.62)        | 1,055 | <b>1.24</b> | <b>(1.13, 1.36)</b> |
|                     | Q2                | 139      | 1.02             | (0.74, 1.44)          | 80                | 0.81        | (0.60, 1.09)        | 117   | 1.13        | (0.78, 1.68)        | 922   | <b>1.39</b> | <b>(1.26, 1.52)</b> |
|                     | Q1-low            | 184      | 1.01             | (0.74, 1.41)          | 77                | 1.28        | (0.95, 1.72)        | 165   | 1.27        | (0.89, 1.86)        | 563   | <b>1.85</b> | <b>(1.67, 2.06)</b> |

1. Bold type indicates statistical significance

2. AAPI, Asian American/Pacific Islander; nSES, neighborhood socioeconomic status; IRR, incidence rate ratio; CI, confidence interval; SCC, squamous cell carcinoma; SCLC, small cell lung cancer; LC+OSC, large cell and other cell lung cancer

<https://doi.org/10.1371/journal.pone.0197146.t003>

Hispanic females residing in low enclave neighborhoods regardless of SES had higher overall lung cancer incidence than those residing in low SES, high enclave neighborhoods. For adenocarcinoma, Hispanic males and females, residing in both low nSES and high nSES neighborhoods that were low enclave had higher incidence of adenocarcinoma compared to those residing in low nSES, high enclave neighborhoods; males (IRR, 1.17 [95% CI, 1.04–1.32] and IRR, 1.15 [95% CI, 1.02–1.29], respectively) and females (IRR, 1.29 [95% CI, 1.15–1.44] and IRR, 1.51 [95% CI, 1.36–1.67], respectively). For overall lung cancer, only AAPI males residing in high SES, low enclave neighborhoods had lower incidence than those residing in low SES, high enclave neighborhoods (IRR, 0.81; 95% CI, 0.76–0.87). However, AAPI males residing in both low SES and high SES, low enclave neighborhoods had lower adenocarcinoma incidence. There were no differences in incidence of overall lung cancer or adenocarcinoma by the joint nSES/ethnic enclave measure among AAPI females. We were unable to examine incidence of other histologic cell types jointly by nSES and enclave status due to low numbers of cases.

## Discussion

In this population-based study with over 75,000 lung cancer cases, we observed higher incidence of lung cancer among Black and White males and females and AAPI males residing in

**Table 4. Lung cancer incidence rate ratios<sup>1</sup> for all lung cancers and histologic cell-types by Hispanic ethnic enclave for Hispanic males and females, California 2008–2012.**

|                     | Ethnic enclave | Male  |                  |                        | Female |             |                     |
|---------------------|----------------|-------|------------------|------------------------|--------|-------------|---------------------|
|                     |                | Cases | IRR <sup>2</sup> | (95% CI <sup>2</sup> ) | Cases  | IRR         | (95% CI)            |
| Overall lung cancer | Q4-high        | 1953  | 1.00             | reference              | 1440   | 1.00        | reference           |
|                     | Q3             | 1257  | 1.02             | (0.95, 1.10)           | 1141   | <b>1.25</b> | <b>(1.15, 1.35)</b> |
|                     | Q2             | 744   | 1.07             | (0.97, 1.17)           | 805    | <b>1.50</b> | <b>(1.37, 1.63)</b> |
|                     | Q1-low         | 452   | <b>1.14</b>      | <b>(1.02, 1.27)</b>    | 503    | <b>1.64</b> | <b>(1.48, 1.82)</b> |
| Adenocarcinoma      | Q4-high        | 801   | 1.00             | reference              | 767    | 1.00        | reference           |
|                     | Q3             | 569   | <b>1.14</b>      | <b>(1.01, 1.27)</b>    | 600    | <b>1.23</b> | <b>(1.10, 1.37)</b> |
|                     | Q2             | 330   | <b>1.18</b>      | <b>(1.02, 1.35)</b>    | 446    | <b>1.56</b> | <b>(1.38, 1.76)</b> |
|                     | Q1-low         | 197   | <b>1.24</b>      | <b>(1.05, 1.46)</b>    | 271    | <b>1.64</b> | <b>(1.42, 1.89)</b> |
| SCC <sup>2</sup>    | Q4-high        | 430   | 1.00             | reference              | 197    | 1.00        | reference           |
|                     | Q3             | 276   | 1.02             | (0.87, 1.19)           | 174    | <b>1.42</b> | <b>(1.15, 1.76)</b> |
|                     | Q2             | 165   | 1.03             | (0.85, 1.24)           | 110    | <b>1.49</b> | <b>(1.17, 1.90)</b> |
|                     | Q1-low         | 111   | 1.20             | (0.96, 1.49)           | 63     | <b>1.58</b> | <b>(1.17, 2.11)</b> |
| SCLC <sup>2</sup>   | Q4-high        | 237   | 1.00             | reference              | 149    | 1.00        | reference           |
|                     | Q3             | 114   | <b>0.72</b>      | <b>(0.56, 0.91)</b>    | 116    | 1.17        | (0.90, 1.50)        |
|                     | Q2             | 83    | 0.96             | (0.73, 1.25)           | 89     | <b>1.56</b> | <b>(1.18, 2.05)</b> |
|                     | Q1-low         | 38    | 0.73             | (0.49, 1.04)           | 52     | <b>1.68</b> | <b>(1.19, 2.32)</b> |
| LC+OSC <sup>2</sup> | Q4-high        | 165   | 1.00             | reference              | 128    | 1.00        | reference           |
|                     | Q3             | 117   | 1.26             | (0.97, 1.63)           | 117    | <b>1.48</b> | <b>(1.13, 1.93)</b> |
|                     | Q2             | 51    | 0.89             | (0.62, 1.24)           | 68     | <b>1.43</b> | <b>(1.04, 1.95)</b> |
|                     | Q1-low         | 41    | 1.42             | (0.97, 2.03)           | 51     | <b>1.93</b> | <b>(1.35, 2.70)</b> |
| Unspecified         | Q4-high        | 320   | 1.00             | reference              | 199    | 1.00        | reference           |
|                     | Q3             | 181   | 0.88             | (0.72, 1.07)           | 134    | 1.06        | (0.84, 1.34)        |
|                     | Q2             | 115   | 1.01             | (0.8, 1.27)            | 92     | 1.23        | (0.95, 1.59)        |
|                     | Q1-low         | 65    | 0.96             | (0.71, 1.27)           | 66     | <b>1.53</b> | <b>(1.13, 2.04)</b> |

1. Bold type indicates statistical significance

2. IRR, incidence rate ratio; CI, confidence interval; SCC, squamous cell carcinoma; SCLC, small cell lung cancer; LC+OSC, large cell and other cell lung cancer

<https://doi.org/10.1371/journal.pone.0197146.t004>

lower SES neighborhoods. In contrast, incidence did not differ by nSES among AAPI females and Hispanic males, while an inverse association was observed among Hispanic females such that lung cancer incidence was actually lower in lower SES neighborhoods. However, examining histologic cell-type-specific lung cancer incidence according to nSES indicated somewhat varying patterns, especially among Hispanics and AAPIs. Among Hispanics and AAPIs, we also observed varying patterns of lung cancer incidence according to ethnic enclave that were specific to groups defined by sex, race/ethnicity, and histologic cell type. Examining incidence patterns jointly by nSES and ethnic enclave among Hispanics and AAPIs suggested that nSES-related gradients may, in some cases, be driven more by ethnic enclave status rather than by SES.

Previous studies have reported higher incidence of overall lung cancer among those of lower area-level SES [2–5] for most groups defined by sex and race/ethnicity, similar to our report. Higher incidence of overall lung cancer among Black and White males and females residing in lower SES neighborhoods likely reflects higher levels of smoking among Black and White residents of low SES neighborhoods [7, 18, 19]. Similar to previous studies, we also report lower incidence of overall lung cancer among Hispanic females residing in lower SES neighborhoods and null associations among AAPI females [2, 4, 5]. However, contrary to



**Table 5. Lung cancer incidence rate ratios<sup>1</sup> for all lung cancers and histologic cell-types<sup>2</sup> by Asian ethnic enclave for AAPI<sup>3</sup> males and females, California 2008–2012.**

|                     | Ethnic enclave | Male  |                                         | Female |                          |
|---------------------|----------------|-------|-----------------------------------------|--------|--------------------------|
|                     |                | Cases | IRR <sup>3</sup> (95% CI <sup>3</sup> ) | Cases  | IRR (95% CI)             |
| Overall lung cancer | Q4-high        | 3237  | 1.00 reference                          | 2246   | 1.00 reference           |
|                     | Q3             | 965   | 0.96 (0.89, 1.03)                       | 737    | 0.99 (0.91, 1.08)        |
|                     | Q2             | 511   | 0.93 (0.84, 1.02)                       | 454    | 1.08 (0.97, 1.20)        |
|                     | Q1-low         | 202   | 0.93 (0.80, 1.08)                       | 197    | 1.15 (0.99, 1.33)        |
| Adenocarcinoma      | Q4-high        | 1714  | 1.00 reference                          | 1667   | 1.00 reference           |
|                     | Q3             | 505   | 0.93 (0.84, 1.04)                       | 520    | 0.93 (0.84, 1.02)        |
|                     | Q2             | 263   | 0.91 (0.79, 1.04)                       | 298    | 0.96 (0.84, 1.09)        |
|                     | Q1-low         | 102   | 0.89 (0.72, 1.09)                       | 125    | 0.98 (0.81, 1.18)        |
| SCC <sup>3</sup>    | Q4-high        | 591   | 1.00 reference                          | 145    | 1.00 reference           |
|                     | Q3             | 185   | 1.03 (0.87, 1.22)                       | 73     | <b>1.59 (1.18, 2.13)</b> |
|                     | Q2             | 99    | 1.01 (0.80, 1.25)                       | 44     | <b>1.68 (1.16, 2.37)</b> |
|                     | Q1-low         | 45    | 1.13 (0.80, 1.54)                       | 28     | <b>2.64 (1.69, 4.01)</b> |
| SCLC <sup>3</sup>   | Q4-high        | 278   | 1.00 reference                          | 79     | 1.00 reference           |
|                     | Q3             | 72    | 0.83 (0.62, 1.08)                       | 31     | 1.21 (0.76, 1.86)        |
|                     | Q2             | 42    | 0.86 (0.60, 1.20)                       | 20     | 1.32 (0.76, 2.21)        |
|                     | Q1-low         | 20    | 0.99 (0.58, 1.58)                       | 18     | <b>2.86 (1.59, 4.91)</b> |
| Unspecified         | Q4-high        | 467   | 1.00 reference                          | 257    | 1.00 reference           |
|                     | Q3             | 154   | 1.04 (0.86, 1.26)                       | 70     | 0.84 (0.64, 1.11)        |
|                     | Q2             | 82    | 1.00 (0.77, 1.27)                       | 68     | <b>1.36 (1.02, 1.79)</b> |
|                     | Q1-low         | 27    | 0.92 (0.59, 1.36)                       | 16     | 0.80 (0.45, 1.35)        |

1. Bold type indicates statistical significance

2. Results not provided for LC+OSC due to low numbers

3. AAPI, Asian American/Pacific Islander; IRR, incidence rate ratio; CI, confidence interval; SCC, squamous cell carcinoma; SCLC, small cell lung cancer; LC+OSC, large cell and other cell lung cancer

<https://doi.org/10.1371/journal.pone.0197146.t005>

previous reports, we do not observe patterns of overall lung cancer incidence by nSES among Hispanic males [2, 4, 5]. This result from our contemporary population (2008–2012) may reflect changing associations over time as Wong et al., in a study of lung cancer cases from 1988–2002, reported a positive linear trend between nSES and NSCLC incidence among Hispanic males that was driven by older age groups [4].

The pattern of higher lung cancer incidence for residents of lower SES neighborhoods generally holds for most histologic cell-types among AAPI males and Black and White males and females. However, this pattern was least consistent for adenocarcinoma across races/ethnicities and the magnitude of effect was generally smaller. The association between smoking and adenocarcinoma is weaker compared to other histologic cell-types [12, 20], thus our results likely reflect other environmental exposures and genetic and molecular factors (that presumably are not as strongly associated with nSES as smoking) as the driving factors of adenocarcinoma development [12, 20]. In fact, with increasing understanding of the high rates of epidermal growth factor receptor (*EGFR*) mutated lung cancer in non-smoking Asian and Hispanic women, it is clear that the etiology of this subtype of lung cancer is quite different than the more common smoking-associated subtypes [21–23].

Previous studies have suggested that, compared to nSES, acculturation factors may be stronger predictors of lung cancer incidence among Hispanics [4, 11]. In a SEER study of lung cancers diagnosed among Hispanics (1988–1992), Eschbach et al. reported that Hispanic

**Table 6. Lung cancer incidence rate ratios<sup>1</sup> for all lung cancers and lung adenocarcinomas by joint nSES, ethnic enclave for Hispanic and AAPI males and females, California 2008–2012.**

| Hispanic            |                                   |       |                  |                        |        |             |                     |
|---------------------|-----------------------------------|-------|------------------|------------------------|--------|-------------|---------------------|
|                     | nSES, ethnic enclave <sup>2</sup> | Male  |                  |                        | Female |             |                     |
|                     |                                   | Cases | IRR <sup>3</sup> | (95% CI <sup>3</sup> ) | Cases  | IRR         | (95% CI)            |
| Overall lung cancer | Low nSES, High enclave            | 1896  | 1.00             |                        | 1390   | 1.00        |                     |
|                     | Low nSES, Low enclave             | 1188  | <b>1.09</b>      | <b>(1.01, 1.18)</b>    | 1093   | <b>1.41</b> | <b>(1.29, 1.53)</b> |
|                     | High nSES, High enclave           | 57    | 1.03             | (0.77, 1.35)           | 50     | 1.14        | (0.84, 1.51)        |
|                     | High nSES, Low enclave            | 1265  | 1.03             | (0.95, 1.11)           | 1356   | <b>1.39</b> | <b>(1.29, 1.51)</b> |
| Adenocarcinoma      | Low nSES, High enclave            | 784   | 1.00             | reference              | 740    | 1.00        | reference           |
|                     | Low nSES, Low enclave             | 522   | <b>1.17</b>      | <b>(1.04, 1.32)</b>    | 537    | <b>1.29</b> | <b>(1.15, 1.44)</b> |
|                     | High nSES, High enclave           | 17    | 0.79             | (0.45, 1.27)           | 27     | 1.14        | (0.74, 1.67)        |
|                     | High nSES, Low enclave            | 574   | <b>1.15</b>      | <b>(1.02, 1.29)</b>    | 780    | <b>1.51</b> | <b>(1.36, 1.67)</b> |
| AAPI <sup>3</sup>   |                                   |       |                  |                        |        |             |                     |
|                     | nSES, ethnic enclave              | Male  |                  |                        | Female |             |                     |
|                     |                                   | Cases | IRR              | (95% CI)               | Cases  | IRR         | (95% CI)            |
| Overall lung cancer | Low nSES, High enclave            | 1153  | 1.00             |                        | 720    | 1.00        |                     |
|                     | Low nSES, Low enclave             | 979   | 0.93             | (0.86, 1.02)           | 729    | 1.05        | (0.94, 1.16)        |
|                     | High nSES, High enclave           | 122   | 1.10             | (0.91, 1.34)           | 85     | 1.16        | (0.91, 1.46)        |
|                     | High nSES, Low enclave            | 2661  | <b>0.81</b>      | <b>(0.76, 0.87)</b>    | 2100   | 0.98        | (0.89, 1.06)        |
| Adenocarcinoma      | Low nSES, High enclave            | 575   | 1.00             |                        | 524    | 1.00        |                     |
|                     | Low nSES, Low enclave             | 459   | <b>0.88</b>      | <b>(0.77, 0.99)</b>    | 488    | 0.96        | (0.84, 1.09)        |
|                     | High nSES, High enclave           | 61    | 1.10             | (0.82, 1.44)           | 60     | 1.10        | (0.83, 1.45)        |
|                     | High nSES, Low enclave            | 1489  | <b>0.90</b>      | <b>(0.82, 0.99)</b>    | 1538   | 0.97        | (0.88, 1.08)        |

1. Bold type indicates statistical significance.

2. Low nSES, quartiles 1–2; High SES, quartiles 3–4; High enclave, quartile 4; Low enclave, quartiles 1–3.

3. AAPI, Asian American/Pacific Islander; IRR, incidence rate ratio; CI, confidence interval.

<https://doi.org/10.1371/journal.pone.0197146.t006>

males and females residing in census tracts with less than 20% Hispanic populations had higher incidence of overall lung cancer [11]. Our results confirm this with a contemporary Hispanic population, using a multi-component Hispanic ethnic enclave measure [15, 24], and further show that the influence of Hispanic ethnic enclave on lung cancer incidence differs by sex and lung cancer histologic cell-type: lower Hispanic enclave was associated with greater incidence only for Hispanic males with adenocarcinoma, but across all histologic cell-types for Hispanic females. We found that low ethnic enclave drives patterns in lung adenocarcinoma incidence among Hispanic male and female residents, an effect that seemed particularly strong for Hispanic females. However, for overall lung cancer incidence, the observation that only Hispanic males residing in neighborhoods of both low nSES and low enclave had higher incidence of overall lung cancer indicates the importance of both nSES and ethnic enclave.

There is little information in the literature regarding associations between neighborhood acculturation and smoking prevalence among Hispanic adults. A study of Mexican adults reported null associations between neighborhood acculturation factors and smoking rates, but the multi-level model included a potential mediator, individual acculturation, which has been associated with increased rates of smoking among Hispanics, especially Hispanic females [25–27]. Furthermore, ethnic enclaves may influence smoking rates (for better or worse) via pathways both dependent and independent of individual acculturation. Additional potential mediators of enclave on smoking prevalence include the reinforcement of cultural norms [24, 28], discrimination and chronic stress [24], and targeted tobacco advertising [29]. In addition, the

effects of ethnic enclaves on smoking rates among Hispanics likely differ by the dominant national origin within the neighborhood; [26, 30]. For example, Puerto Rican-Americans and Cuban-Americans were more likely to be heavy smokers than Mexican-Americans [30]. In California, the Hispanic population is predominantly of Mexican origin [31].

To our knowledge, no prior study has considered Asian ethnic enclave and lung cancer incidence among AAPIs. Examining incidence jointly by nSES and ethnic enclave among AAPI males indicates significantly lower incidence of adenocarcinoma for residents of low enclave neighborhoods, regardless of nSES, which suggests that high ethnic enclave drives adenocarcinoma incidence in this group. Among AAPI females, neighborhood SES and Asian enclave status may be less relevant to the etiology of adenocarcinoma and LC+OSC. Our power was limited to evaluate joint associations for other sub-types, where independent associations for nSES and enclave were much stronger, as was the case with SCC and SCLC histologic cell-types. To our knowledge, only one study by Kandula et al. addressed associations between neighborhood factors and smoking prevalence among Asians [32] and reported that, among Asian females, residing in a neighborhood with a lower percent of Asians was associated with a higher smoking prevalence. Therefore, our findings for the SCC and SCLC histologic cell-types, the two cell-types most strongly associated with smoking, may be due to higher smoking among AAPI females living in lower enclave neighborhoods [32].

Furthermore, any influence of ethnic enclave on smoking or other lung cancer risk factors among AAPIs is likely influenced by the dominant neighborhood culture, as ever-smoking prevalence among AAPI males differs greatly by national origin, ranging from 15% among Vietnamese males to 59% among Native Hawaiian/Pacific Islander males [33]. In addition, ever-smoking prevalence varies widely according to national origin among Asian females, ranging from 0.3% in Vietnamese to 40% in Japanese females [33]. Thus, future studies should consider smoking status in addition to nSES, ethnic enclave, and histologic sub-type among AAPIs, as well as associations between neighborhood factors and lung cancer incidence across specific AAPI subgroups.

There are several strengths to our study. Our study included a large population-based sample of diverse lung cancer cases with sufficient numbers to address subtypes separately and utilized composite indices for measuring nSES and neighborhood acculturation [15]. As a result, we were able to uncover undocumented associations between neighborhood factors and lung cancer incidence. However, our study does have some limitations. We were unable to disaggregate AAPIs and Hispanics into specific populations defined by national origin or immigration status, due to lack of appropriate population denominator data. In addition, we were unable to evaluate clinical factors (such as tumor associated mutations), individual-level factors such as smoking history, passive smoking, family history of lung cancer, use of medical services, environmental exposures, or individual measures of SES or acculturation due to lack of availability of this data. Estimates of neighborhood-level smoking prevalences are not available, but would provide a clearer picture of neighborhood factors that correlate with aggregate smoking behavior. Finally, individuals' residential history would improve the study of neighborhood factors associated with lung cancer risk, as it would provide a more accurate portrait of the lung cancer risk period.

## Conclusion

Our study illustrates varying patterns of incidence of lung cancer histologic cell types according to neighborhood SES and ethnic enclave by sex and race/ethnicity. It is important for continuing research on lung cancer etiology to consider, in addition to individual-level exposures (e.g.; smoking status, individual-level SES), the clear contextual-level effects of nSES and, for Hispanics and AAPIs, the joint effects of nSES and ethnic enclave.

## Supporting information

**S1 Fig. Lung cancer incidence rate ratios (IRRs) and 95% confidence intervals (95% CIs) according to neighborhood SES (nSES) quartile for lung cancer histologic cell-types among males diagnosed in California 2008–2012.** IRRs and 95% CIs for (A) overall lung cancer, (B) adenocarcinoma, (C) squamous cell carcinoma (SCC), (D) small-cell lung carcinoma (SCLC), (E) large-cell and other specified carcinoma (LC+OSC), and (F) unspecified lung cancers among non-Hispanic White (White, orange), non-Hispanic Black (Black, green), Asian American and Pacific Islander (AAPI, red), and Hispanic (blue) males. Markers represent IRRs and horizontal solid lines represent 95% CIs. The highest nSES quartile (Q4) serves as the reference category (IRR, 1.0; represented by the vertical dotted line). (DOCX)

**S2 Fig. Lung cancer incidence rate ratios (IRRs) and 95% confidence intervals (95% CIs) according to neighborhood SES (nSES) quartile for lung cancer histologic cell-types among females diagnosed in California 2008–2012.** IRRs and 95% CIs for (A) overall lung cancer, (B) adenocarcinoma, (C) squamous cell carcinoma (SCC), (D) small-cell lung carcinoma (SCLC), (E) large-cell and other specified carcinoma (LC+OSC), and (F) unspecified lung cancers among non-Hispanic White (White, orange), non-Hispanic Black (Black, green), Asian American and Pacific Islander (AAPI, red), and Hispanic (blue) females. Markers represent IRRs and horizontal solid lines represent 95% CIs. The highest nSES quartile (Q4) serves as the reference category (IRR, 1.0; represented by the vertical dotted line). (DOCX)

**S3 Fig. Lung cancer incidence rate ratios (IRRs) and 95% confidence intervals (95% CIs) according to quartile of neighborhood Hispanic ethnic enclave for lung cancer histologic cell-types among Hispanic males and females diagnosed in California 2008–2012.** IRRs and 95% CIs for overall lung cancer (black), adenocarcinoma (blue), squamous cell carcinoma (SCC, red), small-cell lung carcinoma (SCLC, green), large-cell and other specified cell carcinoma (LC+OSC, orange), and unspecified lung cancers (purple) among Hispanic (A) males and (B) females. Markers represent IRRs and horizontal solid lines represent 95% CIs. The highest quartile of neighborhood Hispanic ethnic enclave (Q4) serves as the reference category (IRR, 1.0, represented by the vertical dotted line). (DOCX)

**S4 Fig. Lung cancer incidence rate ratios (IRRs) and 95% confidence intervals (95% CIs) according to quartile of neighborhood Asian ethnic enclave for lung cancer histologic cell types among Asian American and Pacific Islander (AAPI) males and females diagnosed in California 2008–2012.** IRRs and 95% CIs for overall lung cancer (black), adenocarcinoma (blue), squamous cell carcinoma (SCC, red), small-cell lung carcinoma (SCLC, green), large-cell and other specified cell carcinoma (LC+OSC, orange), and unspecified lung cancers (purple) among AAPI (A) males and (B) females. Markers represent IRRs and horizontal solid lines represent 95% CIs. The highest quartile of neighborhood Asian ethnic enclave (Q4) serves as the reference category (IRR, 1.0, represented by the vertical dotted line). (DOCX)

**S5 Fig. Lung cancer incidence rate ratios (IRRs) and 95% confidence intervals (95% CIs) according to joint neighborhood socioeconomic status (nSES) and ethnic enclave among Hispanic and Asian American Pacific Islander (AAPI) males and females diagnosed in California 2008–2012.** IRRs and 95% CIs for nSES/Hispanic ethnic enclave for all lung cancer (blue) and adenocarcinoma (red) among (A) Hispanic males and (B) Hispanic females and

according to joint nSES/Asian ethnic enclave among (C) AAPI males and (D) AAPI females. Markers represent IRRs and horizontal solid lines represent 95% CIs. Low nSES/High enclave serves as the reference category (IRR, 1.0).

(DOCX)

## Acknowledgments

The ideas and opinions expressed herein are those of the author(s) and endorsement by the State of California, Department of Public Health the National Cancer Institute, and the Centers for Disease Control and Prevention or their Contractors and Subcontractors is not intended nor should be inferred.

## Author Contributions

**Conceptualization:** Scarlett Lin Gomez, Iona Cheng.

**Formal analysis:** Meg McKinley.

**Supervision:** Iona Cheng.

**Writing – original draft:** Mindy C. DeRouen, Lauren Hu.

**Writing – review & editing:** Mindy C. DeRouen, Kathleen Gali, Manali Patel, Christina Clarke, Heather Wakelee, Robert Haile, Scarlett Lin Gomez, Iona Cheng.

## References

1. American Cancer Society. Cancer Facts & Figures 2017. Atlanta: American Cancer Society, 2017.
2. Krieger N, Quesenberry C, Jr., Peng T, Horn-Ross P, Stewart S, Brown S, et al. Social class, race/ethnicity, and incidence of breast, cervix, colon, lung, and prostate cancer among Asian, Black, Hispanic, and White residents of the San Francisco Bay Area, 1988–92 (United States). *Cancer Causes Control*. 1999; 10(6):525–37. Epub 2000/01/05. PMID: [10616822](https://pubmed.ncbi.nlm.nih.gov/10616822/).
3. Sidorchuk A, Agardh EE, Aremu O, Hallqvist J, Allebeck P, Moradi T. Socioeconomic differences in lung cancer incidence: a systematic review and meta-analysis. *Cancer Causes Control*. 2009; 20(4):459–71. <https://doi.org/10.1007/s10552-009-9300-8> PMID: [19184626](https://pubmed.ncbi.nlm.nih.gov/19184626/).
4. Wong ML, Clarke CA, Yang J, Hwang J, Hiatt RA, Wang S. Incidence of non-small-cell lung cancer among California Hispanics according to neighborhood socioeconomic status. *J Thorac Oncol*. 2013; 8(3):287–94. <https://doi.org/10.1097/JTO.0b013e31827bd7f5> PMID: [23399956](https://pubmed.ncbi.nlm.nih.gov/23399956/).
5. Yin D, Morris C, Allen M, Cress R, Bates J, Liu L. Does socioeconomic disparity in cancer incidence vary across racial/ethnic groups? *Cancer Causes Control*. 2010; 21(10):1721–30. Epub 2010/06/23. <https://doi.org/10.1007/s10552-010-9601-y> PMID: [20567897](https://pubmed.ncbi.nlm.nih.gov/20567897/); PubMed Central PMCID: [PMCPmc2941051](https://pubmed.ncbi.nlm.nih.gov/PMC2941051/).
6. Diez Roux AV. Investigating neighborhood and area effects on health. *American journal of public health*. 2001; 91(11):1783–9. PMID: [11684601](https://pubmed.ncbi.nlm.nih.gov/11684601/); PubMed Central PMCID: [PMC1446876](https://pubmed.ncbi.nlm.nih.gov/PMC1446876/).
7. Datta GD, Subramanian S, Colditz GA, Kawachi I, Palmer JR, Rosenberg L. Individual, neighborhood, and state-level predictors of smoking among US Black women: a multilevel analysis. *Social science & medicine*. 2006; 63(4):1034–44.
8. Butler DC, Petterson S, Phillips RL, Bazemore AW. Measures of social deprivation that predict health care access and need within a rational area of primary care service delivery. *Health services research*. 2013; 48(2pt1):539–59.
9. Hajat A, Diez-Roux AV, Adar SD, Auchincloss AH, Lovasi GS, O'Neill MS, et al. Air pollution and individual and neighborhood socioeconomic status: evidence from the Multi-Ethnic Study of Atherosclerosis (MESA). *Environmental Health Perspectives (Online)*. 2013; 121(11–12):1325.
10. Evans GW, Kantrowitz E. Socioeconomic status and health: the potential role of environmental risk exposure. *Annual review of public health*. 2002; 23(1):303–31.
11. Eschbach K, Mahnken JD, Goodwin JS. Neighborhood composition and incidence of cancer among Hispanics in the United States. *Cancer*. 2005; 103(5):1036–44. <https://doi.org/10.1002/cncr.20885> PMID: [15672387](https://pubmed.ncbi.nlm.nih.gov/15672387/); PubMed Central PMCID: [PMCPMC1853250](https://pubmed.ncbi.nlm.nih.gov/PMCPMC1853250/).

12. Pesch B, Kendzia B, Gustavsson P, Jöckel KH, Johnen G, Pohlabeln H, et al. Cigarette smoking and lung cancer—relative risk estimates for the major histological types from a pooled analysis of case–control studies. *International journal of cancer*. 2012; 131(5):1210–9. <https://doi.org/10.1002/ijc.27339> PMID: 22052329
13. Subramanian J, Govindan R. Lung cancer in never smokers: a review. *J Clin Oncol*. 2007; 25(5):561–70. <https://doi.org/10.1200/JCO.2006.06.8015> PMID: 17290066.
14. Lewis DR, Check DP, Caporaso NE, Travis WD, Devesa SS. US lung cancer trends by histologic type. *Cancer*. 2014; 120(18):2883–92. <https://doi.org/10.1002/cncr.28749> PMID: 25113306; PubMed Central PMCID: PMC4187244.
15. Yang J, H A., Clarke CA, K THM., Gomez SL. Developing an area-based socioeconomic measure from American Community Survey data. Fremont, California: Cancer Prevention Institute of California, 2014.
16. Gomez SL, Glaser SL, McClure LA, Shema SJ, Kealey M, Keegan TH, et al. The California Neighborhoods Data System: a new resource for examining the impact of neighborhood characteristics on cancer incidence and outcomes in populations. *Cancer Causes & Control*. 2011; 22(4):631–47.
17. Surveillance Research Program, National Cancer Institute: SEER\*Stat software [[www.seer.cancer.gov/seerstat](http://www.seer.cancer.gov/seerstat)] Version 6.3.4.
18. Charloux A, Quoix E, Wolkove N, Small D, Pauli G, Kreisman H. The increasing incidence of lung adenocarcinoma: reality or artefact? A review of the epidemiology of lung adenocarcinoma. *Int J Epidemiol*. 1997; 26(1):14–23. PMID: 9126499.
19. Kenfield SA, Wei EK, Stampfer MJ, Rosner BA, Colditz GA. Comparison of aspects of smoking among the four histological types of lung cancer. *Tob Control*. 2008; 17(3):198–204. <https://doi.org/10.1136/tc.2007.022582> PMID: 18390646; PubMed Central PMCID: PMC444470.
20. Khuder SA. Effect of cigarette smoking on major histological types of lung cancer: a meta-analysis. *Lung cancer*. 2001; 31(2):139–48.
21. Sharma SV, Bell DW, Settleman J, Haber DA. Epidermal growth factor receptor mutations in lung cancer. *Nat Rev Cancer*. 2007; 7(3):169–81. <https://doi.org/10.1038/nrc2088> PMID: 17318210.
22. Arrieta O, Cardona AF, Federico Bramuglia G, Gallo A, Campos-Parra AD, Serrano S, et al. Genotyping non-small cell lung cancer (NSCLC) in Latin America. *J Thorac Oncol*. 2011; 6(11):1955–9. <https://doi.org/10.1097/JTO.0b013e31822f655f> PMID: 22005474.
23. Shi Y, Au JS, Thongprasert S, Srinivasan S, Tsai CM, Khoa MT, et al. A prospective, molecular epidemiology study of EGFR mutations in Asian patients with advanced non-small-cell lung cancer of adenocarcinoma histology (PIONEER). *J Thorac Oncol*. 2014; 9(2):154–62. <https://doi.org/10.1097/JTO.000000000000033> PMID: 24419411; PubMed Central PMCID: PMC4132036.
24. Abraído-Lanza AF, Armbrister AN, Flórez KR, Aguirre AN. Toward a theory-driven model of acculturation in public health research. *American journal of public health*. 2006; 96(8):1342–6. <https://doi.org/10.2105/AJPH.2005.064980> PMID: 16809597
25. Coreil J, Ray LA, Markides KS. Predictors of smoking among Mexican-Americans: findings from the Hispanic HANES. *Preventive medicine*. 1991; 20(4):508–17. PMID: 1871079
26. Perez-Stable EJ, Ramirez A, Villareal R, Talavera GA, Trapido E, Suarez L, et al. Cigarette smoking behavior among US Latino men and women from different countries of origin. *Am J Public Health*. 2001; 91(9):1424–30. PMID: 11527775; PubMed Central PMCID: PMC1446798.
27. Wilkinson AV, Spitz MR, Strom SS, Prokhorov AV, Barcenas CH, Cao Y, et al. Effects of nativity, age at migration, and acculturation on smoking among adult Houston residents of Mexican descent. *American journal of public health*. 2005; 95(6):1043–9. <https://doi.org/10.2105/AJPH.2004.055319> PMID: 15914831
28. Osypuk TL, Roux AVD, Hadley C, Kandula NR. Are immigrant enclaves healthy places to live? The Multi-ethnic Study of Atherosclerosis. *Social science & medicine*. 2009; 69(1):110–20.
29. Lee JG, Henriksen L, Rose SW, Moreland-Russell S, Ribisl KM. A systematic review of neighborhood disparities in point-of-sale tobacco marketing. *American journal of public health*. 2015; 105(9):e8–e18. <https://doi.org/10.2105/AJPH.2015.302777> PMID: 26180986
30. Haynes SG, Harvey C, Montes H, Nickens H, Cohen BH. Patterns of cigarette smoking among Hispanics in the United States: results from HHANES 1982–84. *American Journal of Public Health*. 1990; 80 (Suppl):47–53.
31. Ennis SR, Rios-Vargas M, Albert NG. The Hispanic Population: 2010. U.S. Department of Commerce, Economics and Statistics Administration, U.S. Census Bureau, 2011.
32. Kandula NR, Wen M, Jacobs EA, Lauderdale DS. Association between neighborhood context and smoking prevalence among Asian Americans. *American journal of public health*. 2009; 99(5):885–92. <https://doi.org/10.2105/AJPH.2007.131854> PMID: 19299683



33. Mukherjea A, Wackowski OA, Lee YO, Delnevo CD. Asian american, native hawaiian and pacific islander tobacco use patterns. *American journal of health behavior*. 2014; 38(3):362–9. <https://doi.org/10.5993/AJHB.38.3.5> PMID: 24636032
